# Supplementary material
Source: PubMed Central journal article supplement (PMC5207183)
Supplement: 10.1074_M116.753236_jbc.M116.753236-1.pdf [file 10.1074_M116.753236_jbc.M116.753236-1.pdf]

# Malignant pleural effusion and ascites induce epithelial–mesenchymal transition and cancer stem-like cell properties via VEGF/PI3K/Akt/mTOR pathway

Tao Yin<sup>a,1</sup>, Guoping Wang<sup>a,1</sup>, Sisi He<sup>a</sup>, Guobo Shen<sup>a</sup>, Chao Su<sup>a</sup>, Yan Zhang<sup>a</sup>, Xiawei Wei<sup>a</sup>, Tinghong Ye<sup>a</sup>, Ling Li<sup>a</sup>, Shengyong Yang<sup>a</sup>, Dan Li<sup>a</sup>, Fuchun Guo<sup>a</sup>, Zemin Mo<sup>a</sup>, Yang Wan<sup>a</sup>, Ping Ai<sup>a</sup>, Xiaojuan Zhou<sup>a</sup>, Yantong Liu<sup>a</sup>, Yongsheng Wang<sup>a</sup>, Yuquan Wei<sup>a</sup>

<sup>a</sup>Department of Thoracic Oncology, State Key Laboratory of Biotherapy and Cancer Center, West China Hospital, Sichuan University, and Collaborative Innovation Center of Biotherapy, Chengdu 610041, PR China

<sup>1</sup>Both authors contributed equally to this work.

## Supplementary Information

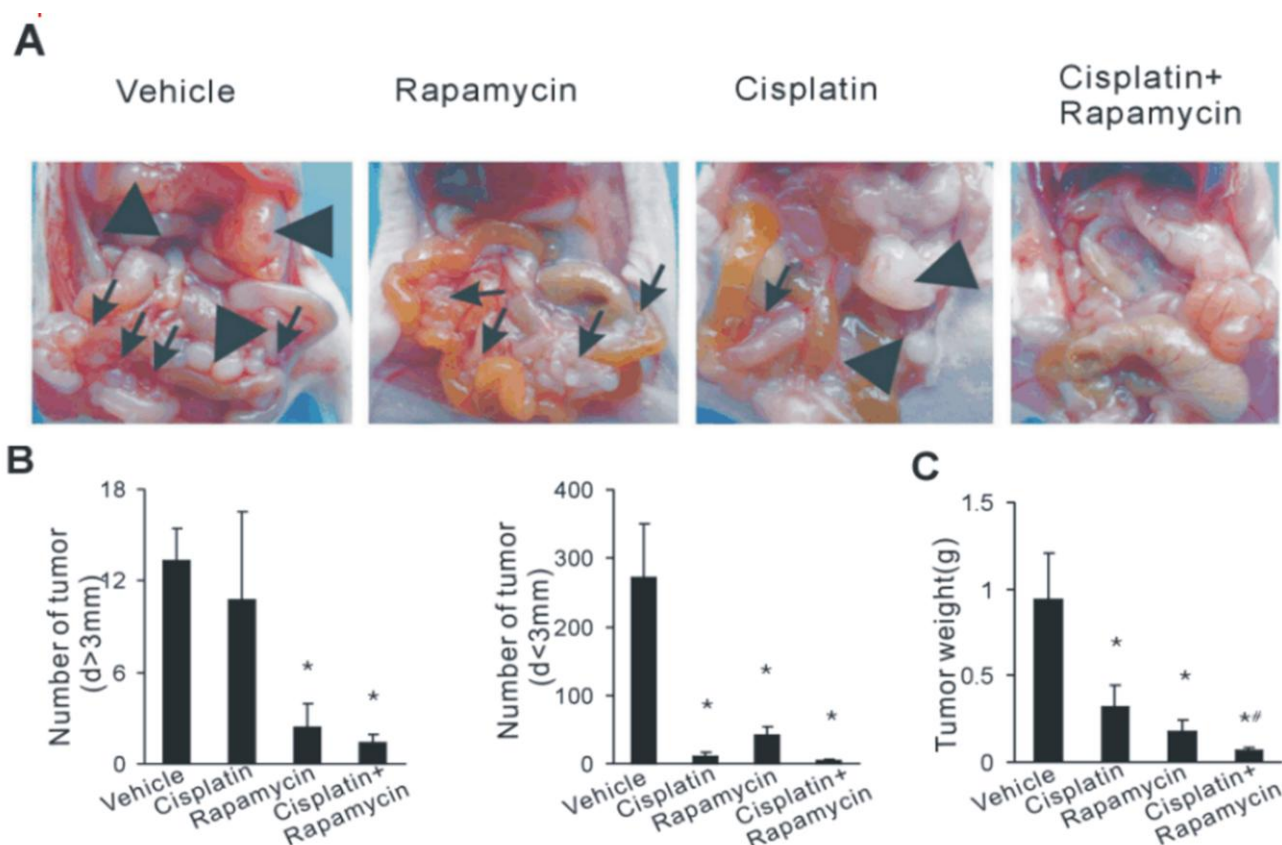

**Supplementary Figure S1. Targeting PI3K/AKT/mTOR pathway is effective for ascetic ovarian cancers.** **A**, BALB/c-nude mice bearing SKOV3 ovarian cancer were treated with vehicle, cisplatin, rapamycin, and cisplatin plus rapamycin, respectively. Representative pictures of tumors in peritoneal cavity with large (arrowhead) and small (arrow) diameters. **B**, the numbers of large (left panel) and small (right panel) tumors was depicted for the respective treatment groups (n=3-5). \*,  $P < 0.05$ . **C**, tumor weight was depicted for the respective treatment groups (n=3-5). \*,  $P < 0.05$  versus vehicle, #,  $P < 0.05$  versus rapamycin and cisplatin.

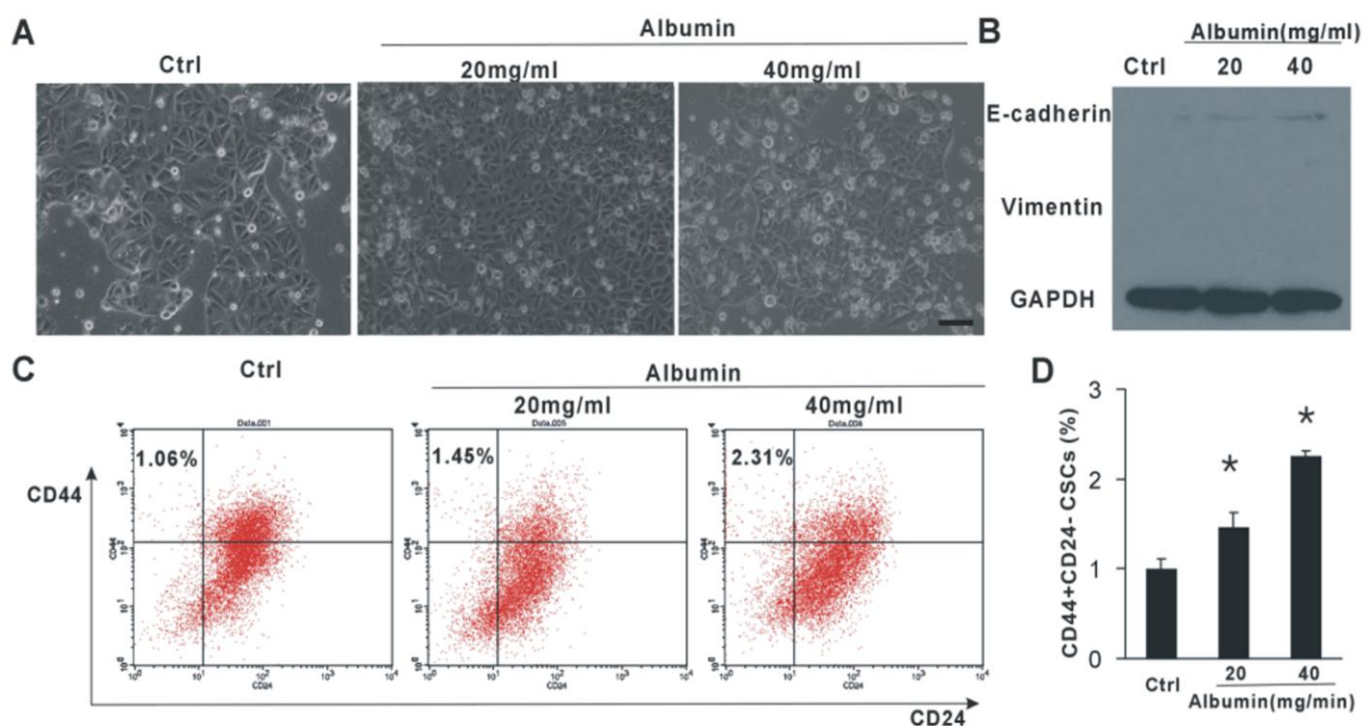

**Supplementary Figure S2. Albumin does not induce epithelial-mesenchymal transition in tumor cells.** **A**, representative phase contrast images of human breast cancer cells MCF-7 cultured with various concentrations of human albumin for twenty days. Scale bar, 50  $\mu$ m. **B**, expression of E-cadherin and vimentin in MCF-7 cells treated with albumin. **C-D**, flow cytometry analysis of MCF-7 cells treated with albumin and their parental cells for CD44 and CD24. CD44<sup>+</sup>/CD24<sup>-</sup> stem cells were quantified. \*,  $P < 0.05$ .

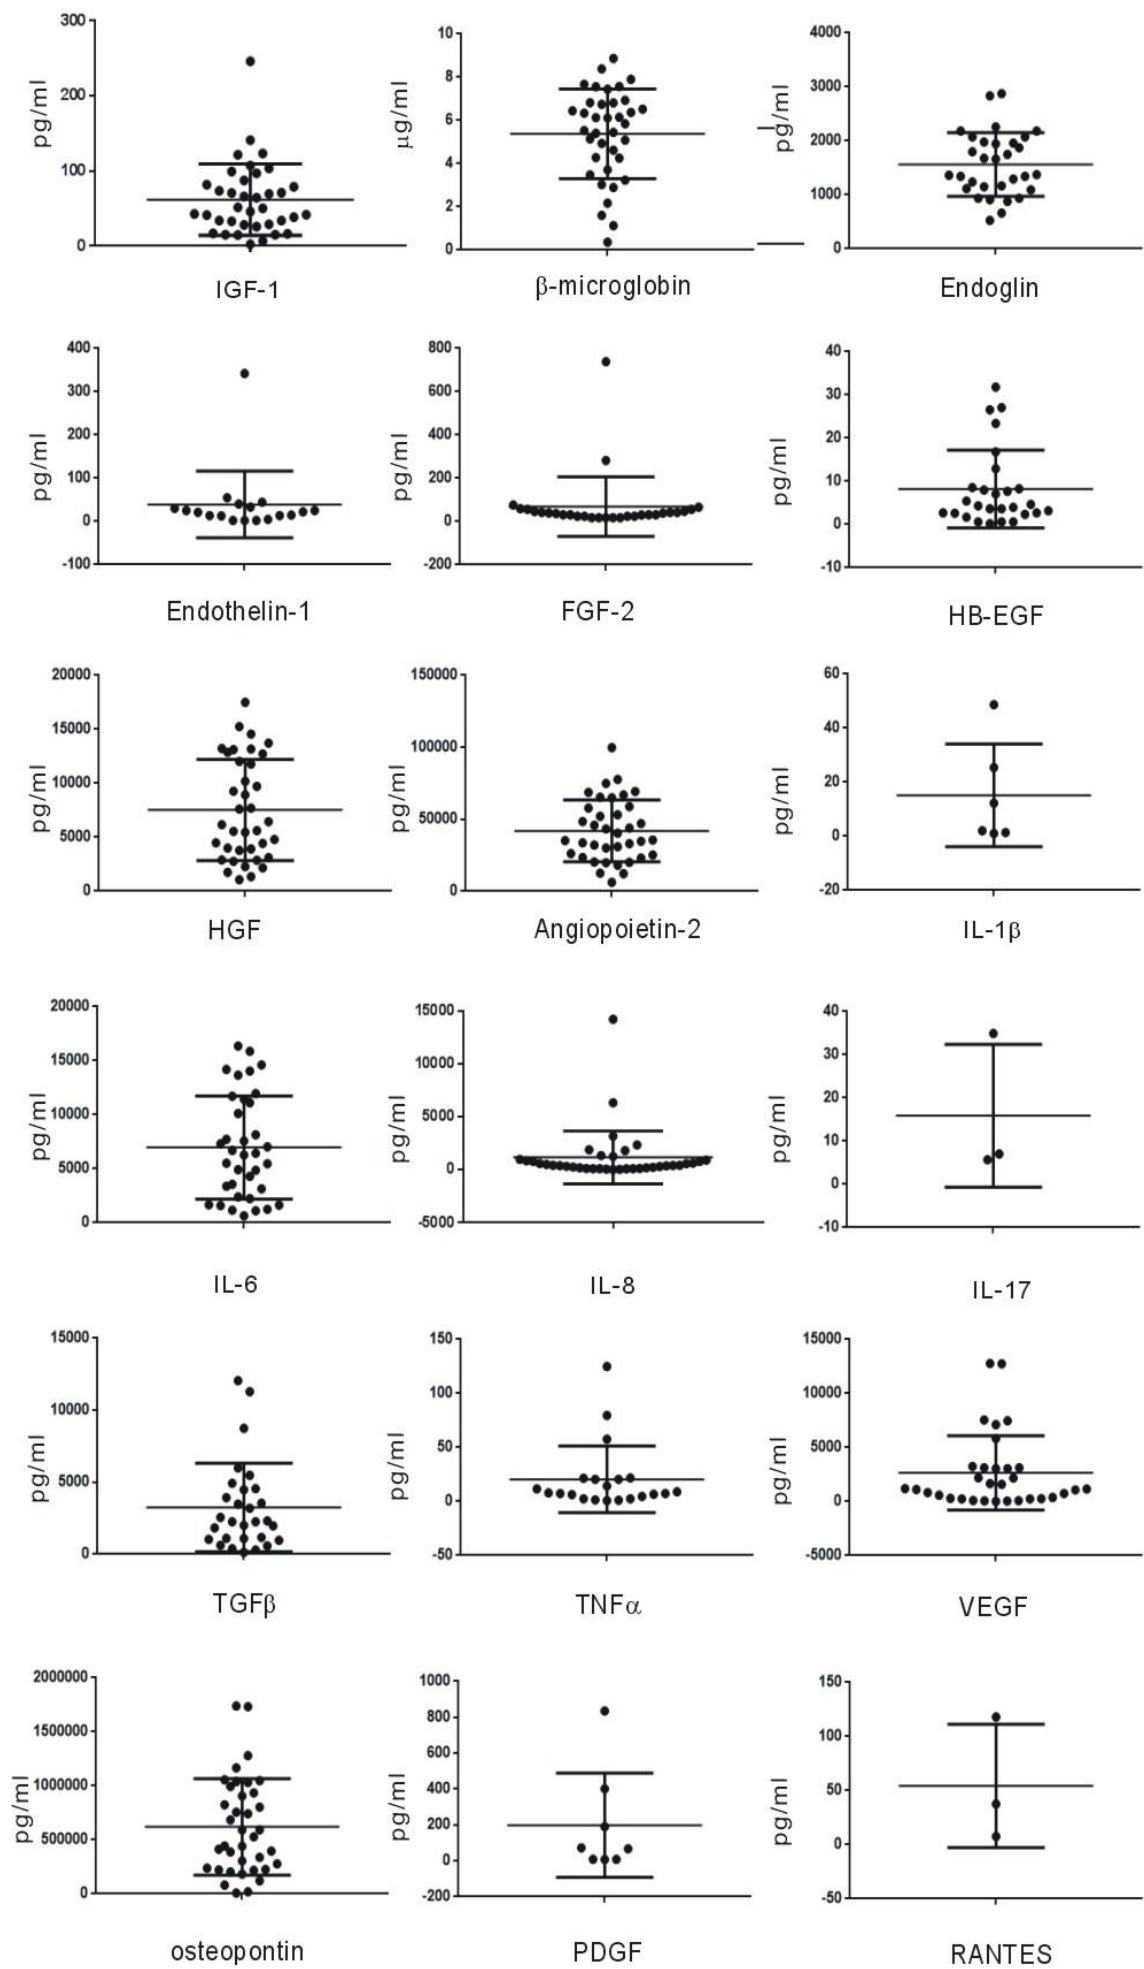

**Supplementary Figure S3. Cytokine concentration in malignant PE and ascites.**

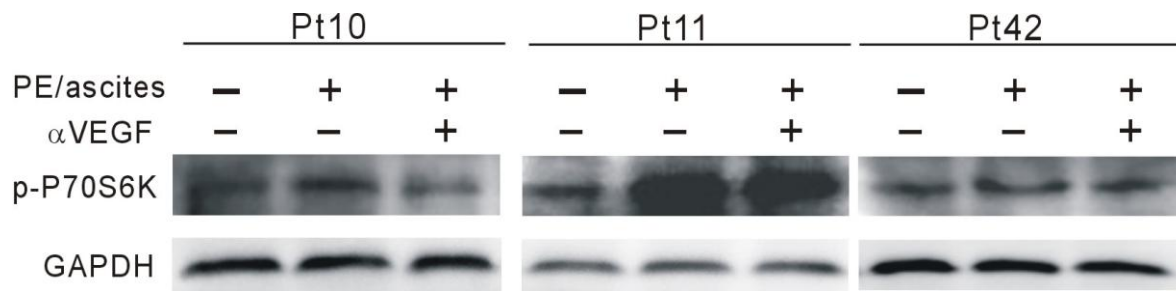

**Supplementary Figure S4. VEGF neutralization reversed the mTOR pathway activation induced by malignant PE and ascites.** MCF-7 cells were treated with malignant PE and ascites for 30 min in the absence or presence of 10 $\mu$ g/ml VEGF antibody. Cell lysates were analyzed by western blot with antibodies against p-P70S6K. GAPDH served as the loading control.

**Supplementary Table S1. Characteristics of human malignant and ascites specimens.**

| Patients | Sex | Age (years) | Cancer type             | Effusion type    |
|----------|-----|-------------|-------------------------|------------------|
| 1        | F   | 42          | Breast Cancer           | Pleural effusion |
| 2        | F   | 72          | Lung Cancer             | Pleural effusion |
| 3        | M   | 59          | Gastric Cancer          | Ascites          |
| 4        | M   | 17          | Lymphoma                | Pleural effusion |
| 5        | M   | 59          | Colorectal Cancer       | Pleural effusion |
| 6        | M   | 76          | Lung cancer             | Pleural effusion |
| 7        | F   | 65          | Lung Cancer             | Pleural effusion |
| 8        | F   | 73          | Breast Cancer           | Pleural effusion |
| 9        | F   | 50          | Lung Cancer             | Pleural effusion |
| 10       | F   | 48          | Colorectal Cancer       | Pleural effusion |
| 11       | F   | 53          | Lung Cancer             | Ascites          |
| 12       | M   | 68          | Lung Cancer             | Pleural effusion |
| 13       | M   | 76          | Lung Cancer             | Pleural effusion |
| 14       | F   | 36          | Lung Cancer             | Pleural effusion |
| 15       | M   | 51          | Peritoneal mesothelioma | Ascites          |
| 16       | M   | 47          | Lung Cancer             | Pleural effusion |
| 17       | F   | 62          | Lung Cancer             | Pleural effusion |
| 18       | M   | 43          | Colorectal Cancer       | Ascites          |

|    |   |    |                                                     |                  |
|----|---|----|-----------------------------------------------------|------------------|
| 19 | M | 65 | Lung Cancer                                         | Pleural effusion |
| 20 | F | 72 | Ovarian Cancer                                      | Ascites          |
| 21 | F | 25 | Lymphoma                                            | Pleural effusion |
| 22 | M | 90 | Lymphoma                                            | Pleural effusion |
| 23 | F | 44 | Lung Cancer                                         | Pleural effusion |
| 24 | F | 45 | Gastric Cancer                                      | Pleural effusion |
| 25 | M | 48 | Gastric Cancer                                      | Ascites          |
| 26 | M | 47 | Peritoneal mesothelioma                             | Ascites          |
| 27 | M | 69 | Lung Cancer                                         | Pleural effusion |
| 28 | M | 55 | Hepatocarcinoma                                     | Ascitis          |
| 29 | M | 43 | Lung Cancer                                         | Pleural effusion |
| 30 | F | 67 | Liver metastatic adenocarcinoma                     | Ascites          |
| 31 | M | 51 | Left axillary lymph nodes metastatic adenocarcinoma | Pleural effusion |
| 32 | M | 55 | Lung Cancer                                         | Pleural effusion |
| 33 | F | 73 | Lung Cancer                                         | Pleural effusion |
| 34 | M | 35 | Lung Cancer                                         | Pleural effusion |
| 35 | M | 38 | Lung Cancer                                         | Pleural effusion |
| 36 | F | 60 | Ovarian Cancer                                      | Ascites          |
| 37 | F | 64 | Lung Cancer                                         | Pleural effusion |
| 38 | F | 48 | Colorectal Cancer                                   | Pleural effusion |
| 39 | F | 53 | Lung Cancer                                         | Pleural effusion |
| 40 | M | 71 | Lung Cancer                                         | Pleural effusion |
| 41 | F | 55 | Lung Cancer                                         | Pleural effusion |
| 42 | M | 38 | Lung Cancer                                         | Pleural effusion |
| 43 | M | 55 | Gastric Cancer                                      | Ascites          |
| 44 | M | 66 | Colorectal Cancer                                   | Ascites          |
| 45 | M | 59 | Gastric Cancer                                      | Ascites          |
| 46 | M | 46 | Lung Cancer                                         | Pleural effusion |
| 47 | F | 51 | Lung Cancer                                         | Pleural effusion |

**Supplementary Table S2. Primer sequences in the study are listed below.**

| gene     | Forward                  | Reverse                  |
|----------|--------------------------|--------------------------|
| Sox2     | AGAACCCCAAGATGCACAAC     | CGGGGCCGGTATTTATAATC     |
| ABCB1    | AGGTTCCAGGATTGGCGTCTT    | CCAGTCATTGCTGCGGTTTCA    |
| ABCG2    | AATACATCAGCGGATACTACAGAG | AGCCACCATCATAAGGGTAAACAT |
| Patch    | AAACCTCCTTTGCGGTGGACAAAC | TGTAACCATGACCAACCTCAGCCT |
| Smo      | ACCTATGCCTGGCACACTTC     | GTGAGGACAAAGGGGAGTGA     |
| Gli-1    | CCCAATCACAAGTCAGGTTTCCT  | CCTATGTGAAGCCCTATTTGCC   |
| Nodal    | AGCATGGTTTTGGAGGTGAC     | CCTGCGAGAGGTTGGAGTAG     |
| Cripto-1 | TCCTTCTACGGACGGAAGT      | ATCACAGCCGGGTAGAAATG     |
| Activin  | AAAGCTTCATGTGGGCAAAG     | AATCTCGAAGTGCAGCGTCT     |
| GAPDH    | CAGGAGCGAGATCCCT         | GGTGCTAAGCAGTTGGT        |
